# Supplementary material
Source: PubMed Central journal article supplement (PMC1895240)
Supplement: blood_2005-04-1679_1.pdf [file blood_2005-04-1679_1.pdf]

| <b>Gene Name</b> | <b>Fold Change</b> | <b>Common name</b>                                     | <b>Genbank #</b> | <b>Description</b>                                                                                                        |
|------------------|--------------------|--------------------------------------------------------|------------------|---------------------------------------------------------------------------------------------------------------------------|
| 1451513_x_at     | 57.93              | Serpina1b                                              | BC012874         | serine (or cysteine) proteinase inhibitor, clade A, member 1b                                                             |
| 1441887_x_at     | 50.31              | Sh3bgrl                                                | BB548587         | SH3-binding domain glutamic acid-rich protein like                                                                        |
| 1425923_at       | 43.78              | Nmyc1                                                  | M36277           | neuroblastoma myc-related oncogene 1                                                                                      |
| 1449498_at       | 34.05              | Marco                                                  | NM_010766        | macrophage receptor with collagenous structure                                                                            |
| 1427912_at       | 20.62              | Cbr3                                                   | AK003232         | carbonyl reductase 3                                                                                                      |
| 1423285_at       | 20.14              | Coch                                                   | BB731671         | coagulation factor C homolog (Limulus polyphemus)                                                                         |
| 1430886_at       | 19.02              | 1700112E06Rik                                          | BB246912         | RIKEN cDNA 1700112E06 gene                                                                                                |
| 1436482_a_at     | 13.8               | Sdc3                                                   | BQ032424         | syndecan 3                                                                                                                |
| 1417377_at       | 13.56              | Igsf4                                                  | BF148825         | immunoglobulin superfamily, member 4                                                                                      |
| 1443782_x_at     | 12.41              | cytochrome P450, family 20, subfamily A, polypeptide 1 | AV214523         | AV214523 RIKEN full-length enriched, ES cells Mus musculus cDNA clone 2410137B11 3', mRNA sequence.                       |
| 1447843_at       | 11.99              | Mus musculus transcribed sequences                     | BB297060         | BB297060 RIKEN full-length enriched, 9.5 days embryo parthenogenote Mus musculus cDNA clone B130052C15 3', mRNA sequence. |
| 1425951_a_at     | 11.6               | Clecsf10                                               | AF240358         | C-type (calcium dependent, carbohydrate recognition domain) lectin, superfamily member 10                                 |
| 1417601_at       | 11.43              | Rgs1                                                   | NM_015811        | regulator of G-protein signaling 1                                                                                        |
| 1419627_s_at     | 8.853              | Clecsf10                                               | NM_020001        | C-type (calcium dependent, carbohydrate recognition domain) lectin, superfamily member 10                                 |
| 1437138_at       | 8.592              | Foxm1                                                  | BB398835         | forkhead box M1                                                                                                           |
| 1426663_s_at     | 8.231              | 2210413P12Rik                                          | BC024519         | RIKEN cDNA 2210413P12 gene                                                                                                |
| 1455096_at       | 8.16               | Map4k5                                                 | AW555664         | mitogen-activated protein kinase kinase kinase kinase 5                                                                   |
| 1457906_at       | 7.686              | Mus musculus transcribed sequences                     | BB012065         | kinase 5                                                                                                                  |
| 1447680_at       | 7.683              | Mus musculus transcribed sequences                     | BB046920         | Mus musculus transcribed sequences                                                                                        |
| 1454890_at       | 7.474              | Amot                                                   | BG067039         | BB046920 RIKEN full-length enriched, adult male medulla oblongata Mus musculus cDNA clone 6330541D21 3', mRNA sequence.   |
| 1434177_at       | 7.432              | Mus musculus, clone                                    | AI551117         | angiomotin                                                                                                                |
|                  |                    |                                                        |                  | Mus musculus 10 days neonate cerebellum                                                                                   |

|              |       |                                                                                                                                          |           |                                                                                                                                                                                       |
|--------------|-------|------------------------------------------------------------------------------------------------------------------------------------------|-----------|---------------------------------------------------------------------------------------------------------------------------------------------------------------------------------------|
|              |       | IMAGE:4196918, mRNA                                                                                                                      |           | cDNA, RIKEN full-length enriched library, clone:B930053B19 product:unknown EST, full insert sequence                                                                                  |
|              |       | Mus musculus 16 days embryo head cDNA, RIKEN full-length enriched library, clone:C130038M02 product:unclassifiable, full insert sequence |           | Mus musculus 16 days embryo head cDNA, RIKEN full-length enriched library, clone:C130038M02 product:unclassifiable, full insert sequence                                              |
| 1445870_at   | 7.41  |                                                                                                                                          | BB367621  |                                                                                                                                                                                       |
| 1415935_at   | 7.368 | Smoc2                                                                                                                                    | NM_022315 | SPARC related modular calcium binding 2                                                                                                                                               |
|              |       | Mus musculus mRNA similar to interferon-inducible GTPase (cDNA clone MGC:28051 IMAGE:3675329), complete cds                              |           | Mus musculus mRNA similar to interferon-inducible GTPase (cDNA clone MGC:49532 IMAGE:3495064), complete cds                                                                           |
| 1425722_at   | 6.933 | IMAGE:3675329), complete cds                                                                                                             | BC020118  |                                                                                                                                                                                       |
| 1458965_at   | 6.451 | Mus musculus transcribed sequences                                                                                                       | BF460687  | Mus musculus transcribed sequences                                                                                                                                                    |
| 1456565_s_at | 6.445 | Map3k12                                                                                                                                  | BB370469  | mitogen activated protein kinase kinase kinase 12                                                                                                                                     |
| 1432715_at   | 6.427 | RIKEN cDNA 2810047E21 gene                                                                                                               | AV138895  | Mus musculus transcribed sequences                                                                                                                                                    |
|              |       | complement component 1, q subcomponent, beta polypeptide                                                                                 |           | BB111335 RIKEN full-length enriched, adult male urinary bladder Mus musculus cDNA clone 9530029K06 3' similar to X16874 Mouse mRNA for complement protein C1q B-chain, mRNA sequence. |
| 1437726_x_at | 6.073 |                                                                                                                                          | BB111335  | AU018141 Mouse two-cell stage embryo cDNA                                                                                                                                             |
| 1453238_s_at | 5.876 | ---                                                                                                                                      | AU018141  | Mus musculus cDNA clone J0749C09 3', mRNA sequence.                                                                                                                                   |
|              |       | RIKEN cDNA 3110050N22 gene                                                                                                               |           | Mus musculus 11 days embryo whole body cDNA, RIKEN full-length enriched library, clone:2700022N23 product:CGI-62 PROTEIN homolog [Homo sapiens], full insert sequence                 |
| 1428418_s_at | 5.834 |                                                                                                                                          | BE198251  | retinoic acid induced 14                                                                                                                                                              |
| 1417400_at   | 5.61  | Rai14                                                                                                                                    | AF274866  |                                                                                                                                                                                       |
|              |       | Mus musculus transcribed sequences                                                                                                       |           | Mus musculus transcribed sequences                                                                                                                                                    |
| 1444949_at   | 5.331 |                                                                                                                                          | BG068671  | cDNA sequence BC019943                                                                                                                                                                |
| 1435309_at   | 5.236 | BC019943                                                                                                                                 | AV030795  |                                                                                                                                                                                       |
| 1449376_at   | 5.223 | Nicn1                                                                                                                                    | NM_025449 | nicolin 1                                                                                                                                                                             |
| 1437122_at   | 5.124 | D630044D05Rik                                                                                                                            | BM119782  | RIKEN cDNA D630044D05 gene                                                                                                                                                            |
| 1441965_at   | 5.082 | 4933417K05Rik                                                                                                                            | AV280828  | RIKEN cDNA 4933417K05 gene                                                                                                                                                            |
