# Supplementary material
Source: PubMed Central journal article supplement (PMC1895240)
Supplement: blood_2005-04-1679_2.pdf [file blood_2005-04-1679_2.pdf]

| Gene Name    | Fold Change | Common name                                                                                                                           | Genbank # | Description                                                                                                                                                                        |
|--------------|-------------|---------------------------------------------------------------------------------------------------------------------------------------|-----------|------------------------------------------------------------------------------------------------------------------------------------------------------------------------------------|
| 1439820_at   | 0.18        | Mus musculus 16 days embryo head cDNA, RIKEN full-length enriched library, clone:C130022C07 product:unknown EST, full insert sequence | BB364548  | Mus musculus 16 days embryo head cDNA, RIKEN full-length enriched library, clone:C130022C07 product:unknown EST, full insert sequence                                              |
| 1422580_at   | 0.164       | Myl4                                                                                                                                  | NM_010858 | myosin, light polypeptide 4, alkali; atrial, embryonic                                                                                                                             |
| 1436283_at   | 0.161       | RIKEN cDNA D630042F21 gene                                                                                                            | BB499332  | Mus musculus 0 day neonate kidney cDNA, RIKEN full-length enriched library, clone:D630042F21 product:unknown EST, full insert sequence                                             |
| 1440475_at   | 0.148       | expressed sequence AW011738                                                                                                           | BB740266  | Mus musculus 15 days embryo head cDNA, RIKEN full-length enriched library, clone:D930008A07 product:unknown EST, full insert sequence                                              |
| 1451079_at   | 0.145       | 2610017G09Rik                                                                                                                         | BC021526  | RIKEN cDNA 2610017G09 gene                                                                                                                                                         |
| 1430394_a_at | 0.144       | Abcb9; TAPL                                                                                                                           | AK020749  | Mus musculus 0 day neonate thymus cDNA, RIKEN full-length enriched library, clone:A430101A09 product:ATP-binding cassette, sub-family B (MDR/TAP), member 9, full insert sequence. |
| 1451152_a_at | 0.14        | Atp1b1                                                                                                                                | BC027319  | ATPase, Na <sup>+</sup> /K <sup>+</sup> transporting, beta 1 polypeptide                                                                                                           |
| 1416203_at   | 0.135       | Aqp1                                                                                                                                  | NM_007472 | aquaporin 1                                                                                                                                                                        |
| 1437667_a_at | 0.13        | Bach2                                                                                                                                 | AW553304  | BTB and CNC homology 2                                                                                                                                                             |
| 1438469_at   | 0.13        | B930011H20Rik                                                                                                                         | BG071122  | RIKEN cDNA B930011H20 gene                                                                                                                                                         |
| 1444298_at   | 0.126       | A130090K04Rik                                                                                                                         | BB703415  | RIKEN cDNA A130090K04 gene                                                                                                                                                         |
| 1437745_at   | 0.126       | A730019I05Rik                                                                                                                         | BB127276  | RIKEN cDNA A730019I05 gene                                                                                                                                                         |
| 1449244_at   | 0.123       | Cdh2                                                                                                                                  | BC022107  | cadherin 2                                                                                                                                                                         |
| 1456020_at   | 0.112       | D430044G18Rik                                                                                                                         | BB487775  | RIKEN cDNA D430044G18 gene                                                                                                                                                         |
| 1422921_at   | 0.0819      | Vpreb3                                                                                                                                | NM_009514 | pre-B lymphocyte gene 3                                                                                                                                                            |
| 1436515_at   | 0.0789      | RIKEN cDNA E030004N02 gene                                                                                                            | BB529913  | Mus musculus 0 day neonate lung cDNA, RIKEN full-length enriched library, clone:E030004N02 product:unknown EST, full insert sequence                                               |

|              |         |                                                                                                                                                                                               |           |                                                                                                                                                                                                                                  |
|--------------|---------|-----------------------------------------------------------------------------------------------------------------------------------------------------------------------------------------------|-----------|----------------------------------------------------------------------------------------------------------------------------------------------------------------------------------------------------------------------------------|
| 1460407_at   | 0.059   | Spib                                                                                                                                                                                          | BM244106  | Spi-B transcription factor (Spi-1/PU.1 related) tumor necrosis factor receptor superfamily, member 19                                                                                                                            |
| 1448147_at   | 0.0562  | Tnfrsf19                                                                                                                                                                                      | NM_013869 |                                                                                                                                                                                                                                  |
| 1426864_a_at | 0.0553  | Ncam1                                                                                                                                                                                         | X15052    | neural cell adhesion molecule 1                                                                                                                                                                                                  |
| 1422651_at   | 0.0494  | Acpr30                                                                                                                                                                                        | NM_009605 | adipocyte complement related protein                                                                                                                                                                                             |
| 1417574_at   | 0.0493  | Cxcl12                                                                                                                                                                                        | NM_013655 | chemokine (C-X-C motif) ligand 12<br>AV219418 RIKEN full-length enriched, 12 days embryo head Mus musculus cDNA clone 3010090D11 3' similar to X51905 Mouse Ldh-2 mRNA for lactate dehydrogenase-B (EC 1.1.1.27), mRNA sequence. |
| 1434499_a_at | 0.0351  | lactate dehydrogenase 2, B chain Mus musculus 12 days embryo spinal ganglion cDNA, RIKEN full-length enriched library, clone:D130062J21<br>product:hypothetical protein, full insert sequence | AV219418  | Mus musculus 12 days embryo spinal ganglion cDNA, RIKEN full-length enriched library, clone:D130062J21<br>product:hypothetical protein, full insert sequence                                                                     |
| 1446929_at   | 0.0291  |                                                                                                                                                                                               | BB459664  |                                                                                                                                                                                                                                  |
| 1420176_x_at | 0.0272  | Igl-5                                                                                                                                                                                         | BB139905  | immunoglobulin lambda chain 5                                                                                                                                                                                                    |
| 1449869_at   | 0.0238  | Vpreb1                                                                                                                                                                                        | NM_016982 | pre-B lymphocyte gene 1                                                                                                                                                                                                          |
| 1417484_at   | 0.0191  | Ibsp                                                                                                                                                                                          | NM_008318 | integrin binding sialoprotein                                                                                                                                                                                                    |
| 1422873_at   | 0.0187  | Prg2                                                                                                                                                                                          | NM_008920 | proteoglycan 2, bone marrow                                                                                                                                                                                                      |
| 1420338_at   | 0.0186  | Alox15                                                                                                                                                                                        | L34570    | arachidonate 15-lipoxygenase                                                                                                                                                                                                     |
| 1449757_x_at | 0.0135  | Dntt                                                                                                                                                                                          | BB160593  | deoxynucleotidyltransferase, terminal                                                                                                                                                                                            |
| 1449924_at   | 0.0115  | Prg3                                                                                                                                                                                          | NM_016914 | proteoglycan 3                                                                                                                                                                                                                   |
| 1449136_at   | 0.00849 | Epx                                                                                                                                                                                           | NM_007946 | eosinophil peroxidase                                                                                                                                                                                                            |
| 1450680_at   | 0.00766 | Rag1                                                                                                                                                                                          | NM_009019 | recombination activating gene 1                                                                                                                                                                                                  |
